# Supplementary material for: A Project-Based Biology Unit: Star Athlete Collapses on the Football Field
Source: Oxford University Press journal article supplement (doi:10.1525/abt.2019.81.6.442), 2019-07-31
Supplement: abt.2019.81.6.442-f1.docx [file abt.2019.81.6.442-f1.docx]

**Handout 1: Marcus Brown Case, Day 1**

Marcus Brown is an 18 year old African American male – 6’4” tall, 195 lbs. He is a high school senior and plays wide receiver on the varsity football team. He was the team’s leading scorer as a junior. As a receiver he was noted by scouts to have good speed and an exceptionally long reach.

**Description of Marcus’s Collapse**

Marcus had been having a good senior year on the team. The team record was 2 wins and no losses. For the season he had 11 receptions for 240 yards and 3 touchdowns. The 3rd game of the season was being played in August and the weather was still very hot and humid. He was feeling well on game day and for this game the team was relying heavily on the passing game. By the end of the first quarter Marcus had already run 18 pass routes and had 5 receptions and 1 touchdown. Toward the end of the second quarter, three consecutive long pass routes were called. On the last one, the pass was overthrown. There was no contact on the play. As he was jogging back to the huddle he staggered then collapsed. The coach and trainer ran to him and noted he was not breathing and had no pulse. CPR was started and EMS was called. After 1-2 minutes of CPR, a weak pulse was detected and he began to breathe on his own. EMS arrived and rushed him to the nearest hospital.

**Past Medical History**

Marcus has a history of feeling faint and “passing out” toward the end of the second practice of the new season but quickly recovered. This episode was thought to be due to dehydration and having just gotten over a “bad” cold. He has had no medical problems while growing up. There is no history of concussions or drug use.

**Family History**

His father is an accountant and has high blood pressure but is otherwise healthy. His mother is a middle school teacher and is healthy. Neither parent is very physically active. He has a 15 year old sister who is in the school band and is healthy. His mother states that there is Sickle Cell Disease in her family several generations back but she does not know specifics. He had an uncle on his father’s side who died suddenly at age 34. He was living on the west coast and no one knows the cause of his death. He was thought to be in good health.
