# Supplementary material for: A Project-Based Biology Unit: Star Athlete Collapses on the Football Field
Source: Oxford University Press journal article supplement (doi:10.1525/abt.2019.81.6.442), 2019-07-31
Supplement: abt.2019.81.6.442-f4.docx [file abt.2019.81.6.442-f4.docx]

**Handout 4: Expert Group**

**Disease________________**

Group # _________

| Disease Symptoms |  |
| --- | --- |
| Disease Prevention |  |
| Genetics of Disease |  |
| Other interesting facts |  |

**Home Group Handout**

| Disease | Causes/Symptoms | Prevention | Genetics | Other Facts |
| --- | --- | --- | --- | --- |
| Exertional Heat Stroke |  |  |  |  |
| Sickle Cell Trait |  |  |  |  |
| Marfan Syndrome |  |  |  |  |
| Hypertrophic Cardiomyopathy |  |  |  |  |
