# Supplementary material for: A Project-Based Biology Unit: Star Athlete Collapses on the Football Field
Source: Oxford University Press journal article supplement (doi:10.1525/abt.2019.81.6.442), 2019-07-31
Supplement: abt.2019.81.6.442-f5.docx [file abt.2019.81.6.442-f5.docx]

**Handout 5: Update on Marcus and Plea for Help, Day 4**

Marcus remains in the ICU in critical condition. The results of several critical tests have not been released because the official reports have not been signed. The autopsy report on Marcus’s uncle is being faxed today. His mother is trying to get more family history of sickle cell disease and heart disease. The school is to send sports participation records from previous years.

The team taking care of Marcus are very concerned because they do not have a diagnosis and therefore do not know how best to care for him. They would very much appreciate any recommendations you may have for additional blood work or diagnostic studies. The medical team and the family would also like to know what questions they should be asking relatives and others about family history or medical records. Please have your small group make written recommendations by the end of the day and I will relay those to his medical team and family and try to get as many results as I can by tomorrow morning.
