# Supplementary material for: A Project-Based Biology Unit: Star Athlete Collapses on the Football Field
Source: Oxford University Press journal article supplement (doi:10.1525/abt.2019.81.6.442), 2019-07-31
Supplement: abt.2019.81.6.442-f6.docx [file abt.2019.81.6.442-f6.docx]

**Handout 6: Pedigree**

**Is there a genetic contribution to Marcus Brown’s illness?**

1. Draw a simple family pedigree depicting Marcus Brown’s family based on the information presented in the case study. Use squares to represent males and circles to represent females.
2. What additional information would be helpful if you wanted to explore the possibility of an inherited condition?
3. Expand Marcus’ family tree with the additional information that we were able to obtain.
4. What hypotheses would be consistent with the pedigree if we were to assume that Marcus and his uncle’s illnesses had a genetic basis? Support your answer with evidence from your research and the case.

Recessive allele?

Sex-linked allele?

Dominant allele?
