# Supplementary material for: A Project-Based Biology Unit: Star Athlete Collapses on the Football Field
Source: Oxford University Press journal article supplement (doi:10.1525/abt.2019.81.6.442), 2019-07-31
Supplement: abt.2019.81.6.442-f7.docx [file abt.2019.81.6.442-f7.docx]

**Handout 7: Robert Brown Autopsy Summary**

- A 34 year old African American male who collapsed while playing racquetball. Attempts at resuscitation were unsuccessful.
- 5 feet 10 inches in height and 165 pounds
- Body was without evidence of trauma
- All organ systems within normal limits except for the heart
