# Supplementary material for: A Project-Based Biology Unit: Star Athlete Collapses on the Football Field
Source: Oxford University Press journal article supplement (doi:10.1525/abt.2019.81.6.442), 2019-07-31
Supplement: abt.2019.81.6.442-f8.docx [file abt.2019.81.6.442-f8.docx]

**Handout 8: Final Product Rubric**

| **Criterion** | **4** | **3** | **2** | **1** |
| --- | --- | --- | --- | --- |
| Claim – a statement that answers the driving question: How can we lower the incidence of sudden death in athletes?  (20 points) | - Scientifically accurate - Completely answers the question | - Scientifically accurate - Nearly completely answers the question | - Partially scientifically accurate - Partially answers the question | - Is not scientifically accurate overall - Does not adequately answer the question |
| Evidence – scientific data that supports your claim  (20 points) | - The data are scientifically appropriate to support the claim. - Sufficient and convincing data are presented to support the claim. | - The data are scientifically appropriate to support the claim - The data are basically sufficient and convincing, but tend to be more general and not as specific and in-depth | - The data relate to the claim, but are not entirely scientifically appropriate - The data are not sufficient, though generally support the claim | - There is some evidence provided, but it is not logically linked to the claim or scientifically appropriate |
| Reasoning – a justification that links the claim and evidence.  (20 points) | - Reasoning clearly links evidence to claim - Explains why data count as evidence by using appropriate scientific principles - There are sufficient scientific principles to show in-depth content understanding | - Reasoning adequately links claim to evidence - Includes related scientific principles, but does not show why data count as evidence - Reasoning tends to be more general and shows only partial depth of content understanding | - Reasoning does not adequately link claim to evidence, or clarify why data count as evidence - Includes related and non-related scientific principles, and shows little depth of content understanding | - Reasoning is clearly insufficient and relates only tangentially to claim - Scientific understanding is very limited |
| Recommendations for Audience  (10 points) | At least five appropriate and accurate recommendations/  strategies to prevent incidence of heat-related illness | Only four appropriate and accurate recommendations/  strategies to prevent incidence of heat-related illness | Only three appropriate and accurate recommendations/  strategies to prevent incidence of heat-related illness | Only one to two appropriate and accurate recommendations/  strategies to prevent incidence of heat-related illness |
| Written Communication  (10 points) | No spelling and grammar errors. Information is fluent and easy to follow. | One to two spelling and grammar errors. Information is fluent and easy to follow. | Three to five spelling and grammar errors.  OR  Information is not easy to follow. | Multiple spelling and grammar errors.  AND  Information is not easy to follow. |
| Presentation/Final Product  (10 points) | Appropriate to audience, clear language, easy to read, engaging diagrams, focused topic | Appropriate to audience, fairly clear language, easy to read, focused topic, few visuals included | Appropriate to audience, unclear language, somewhat easy to read, focused topic, no visuals included | Somewhat appropriate to audience, unclear language, not easy to read, unfocused topic, no visuals included |
| Time-Management  (10 points) | Worked well with team and stayed on task |  |  | Did not work well with team and/or stay on task |

Note. CER rubric components adapted from McNeill and Krajcik, 2012.

Total = _______________/100
