# Supplementary material for: A Project-Based Biology Unit: Star Athlete Collapses on the Football Field
Source: Oxford University Press journal article supplement (doi:10.1525/abt.2019.81.6.442), 2019-07-31
Supplement: abt.2019.81.6.442-f9.docx [file abt.2019.81.6.442-f9.docx]

**Handout 9: Letter to Marcus’s Family**

In a formal letter format to Marcus’s family, address the following questions.

1. What was the cause of Marcus’s illness and how was it diagnosed?
2. What are the symptoms that might suggest someone has this disease?
3. What is the genetic basis of this disease?
4. How is this disease transmitted from one individual in a family to another?
5. Should family members be tested and what would be the risk to their children if they are positive?
6. What resources are available to a family that has a member with the disease?
